# Supplementary material
Source: publisher site journal article supplement (https://www.dovepress.com/article/415745)

## Appendix 1: Recruitment and sampling process

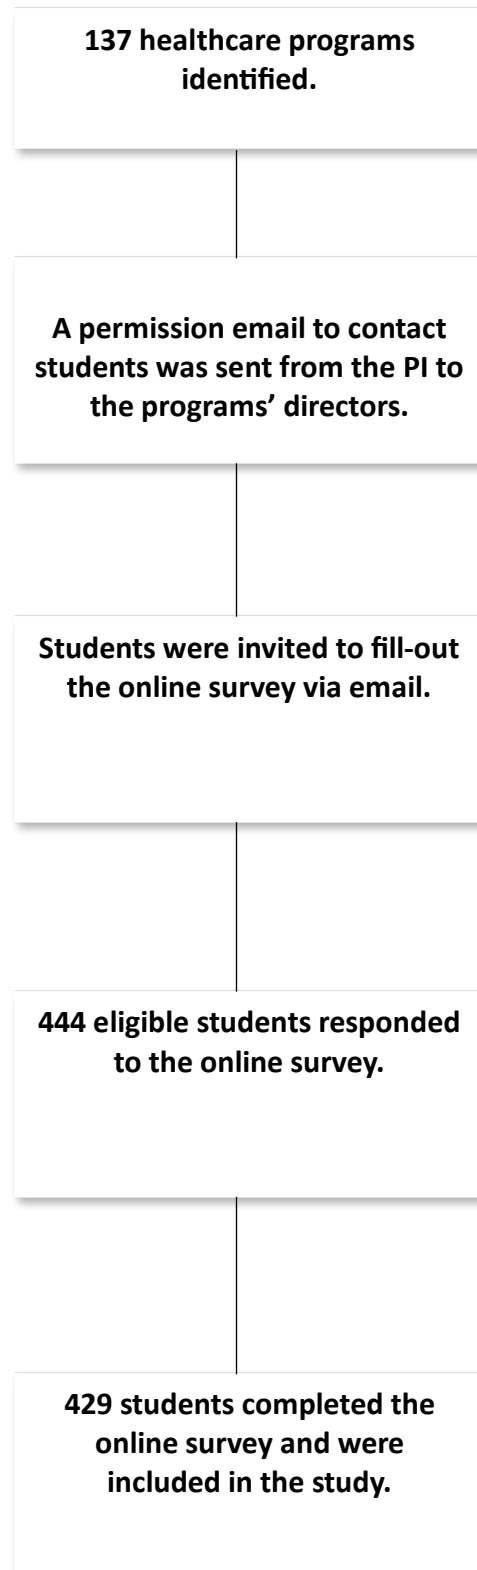

Supplement: Supplementary file 1 [file get_supplementary_file.php]
